# Supplementary material for: Restoration of aged hematopoietic cells by their young counterparts through instructive microvesicles release
Source: publisher site journal article supplement (doi:10.18632/aging.203689), 2021-11-11
Supplement: Supplementary file [file aging-v13i21-203689-supplementary-material-SD1.pdf]

## SUPPLEMENTARY FIGURES

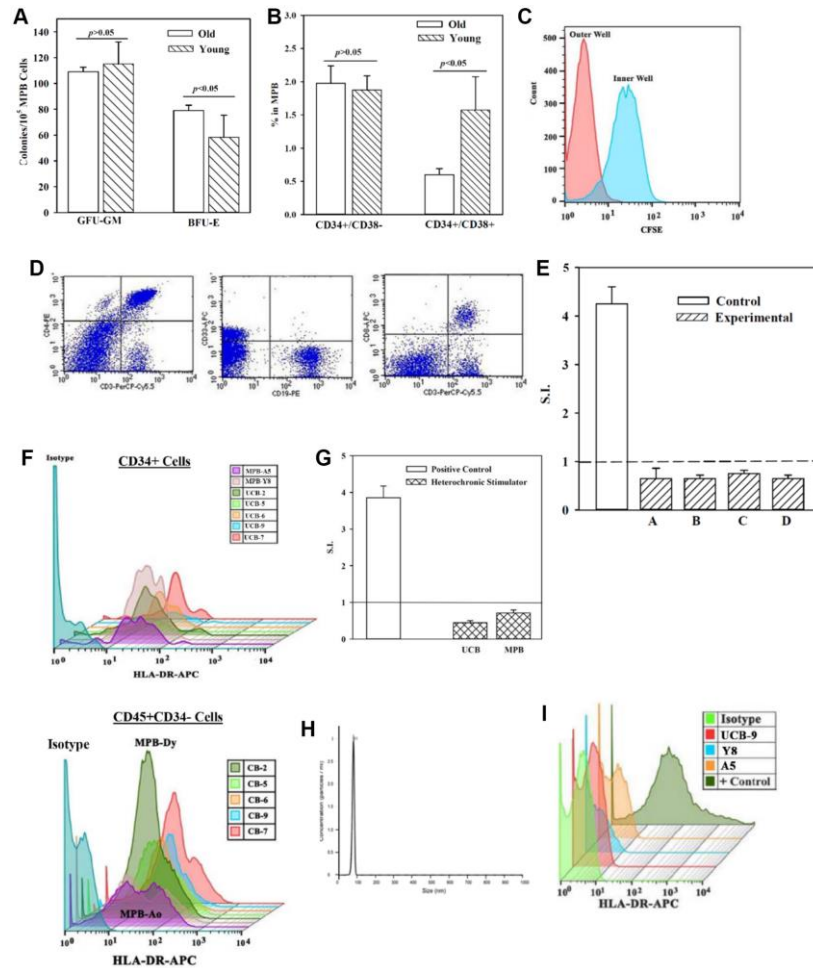

**Supplementary Figure 1.** (A) Clonogenic assay for CFU-GM and BFU-E with MPB cells from young and aged donors ( $n = 8$  for each group, each tested in triplicate). The number of CFU-GM/ $10^5$  cells are presented as the mean  $\pm$  SD. (B) Flow cytometry with cells from young and aged donors. CD45<sup>+</sup> cells were gated for CD34 and then divided based on CD38. The results are presented as the mean MFI  $\pm$  SD for four aged and four young MPBs. (C) Heterochronic transwell cultures contained CFSE-labeled young MPBs in the inner wells and unlabeled aged MPBs in the outer wells. At weekly intervals up to week 4, the inner wells were examined for CFSE. The histogram represents the result at the 4-wk time point. (D) Representative images of flow cytometry for T- (CD3 and CD4), B- (CD19) and myeloid (CD33) cells in the aged MPBs. (E) One-way MLR with restore aged MPB as stimulator and naïve autologous aged MPB as responder. The stimulator cells were derived from heterochronic cultures with aged MPBs (arbitrarily labeled A–D), each tested with two different young MPBs in the inner wells. After 4 wks, the restored aged MPBs were  $\gamma$ -irradiated for testing with in the one-way MLR as stimulator cells. The responder cells were viable freshly thawed autologous MPBs. Positive control used unrestored allogeneic MPBs from young or aged donors. The results are presented as mean stimulation indices (S.I.)  $\pm$  SD for each donor, each tested with two young MPBs in duplicate. The positive controls, which represented 4 experimental points, two with allogeneic aged MPBs and 2 with allogeneic young MPBs showed similar responses and therefore plotted on the same bar. Each MLR test was performed in quadruplicate. (F) Flow cytometry for MHC-II using CD45<sup>+</sup>/CD34<sup>+</sup> cells (top panel) and CD34<sup>-</sup>/CD45<sup>+</sup> (bottom panel) from 5 randomly selected UCB and MPBs from a young and an aged donor. The cells were labeled with anti-HLA-DR-APC or isotype. Shown is representative of a young and an aged MPB donor. The results indicated higher density of MHC-II on CD34<sup>+</sup> and CD34<sup>-</sup> UCB as compared to MPB from the aged young donors. (G) MLR reactions were repeated for ‘E’ except that UCB replaced young MPBs in the inner wells. The results are shown as the mean S.I.  $\pm$  SD from five heterochronic cultures in which four aged MPBs were restored with five different UCB. Each heterochronic culture was done in duplicate and the MLR reactions, in quadruplicate. (H) Representative histogram of MVs, isolated from the media of heterochronic cultures, by nanotracker (Nanosight, Malvern, Westborough, MA). (I) MVs were captured onto CD63-coupled beads followed by labeling with anti-HLA-DR-APC. The labeled beads were subjected to flow cytometric analyses. Representative results show the results of MVs from heterochronic cultures with UCB in the inner wells. Parallel analyses were performed with media from isochronic cultures containing young and aged MPBs. Positive control (+ control) for the flow cytometric technique used anti-CD3 activated mononuclear cells.





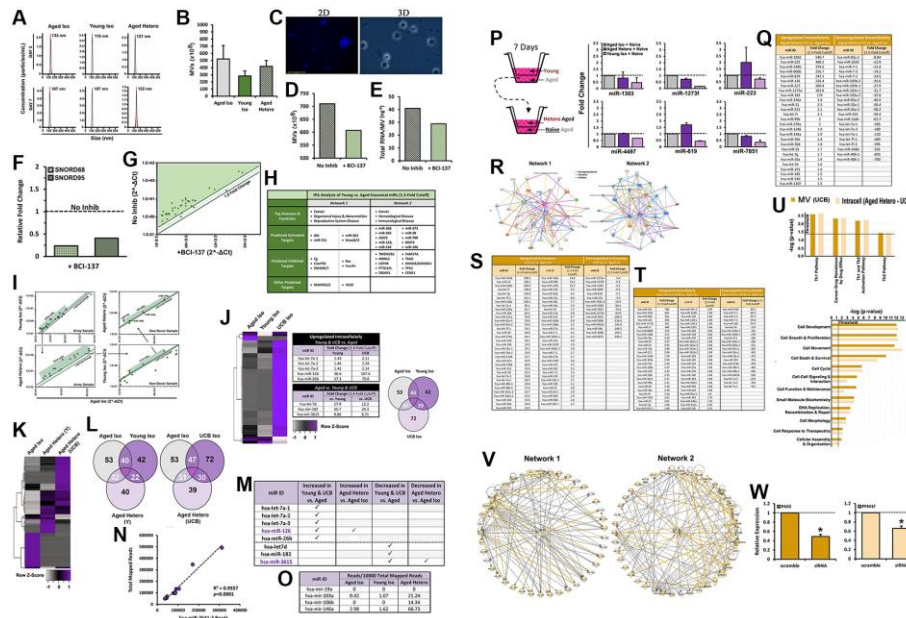

**Supplementary Figure 4.** MVs and their miRNAs in heterochronic (restored) and isochronic (unrestored) cultures (A–H). (A) Nanoparticle tracking analyses (NTA) of MVs from day 3 and 7 heterochronic cultures. (B) MVs in heterochronic or isochronic control cultures were isolated on days 4 and 7, and then pooled. The total number of particles were quantified by NTA, mean  $\pm$  SD,  $n = 4$ . (C) CMAC-labeled MVs from 3-day heterochronic cultures were added to naïve aged MPBs. Shown are 2D and 3D images of MVs entering the cells (blue), imaged by EVOS fl and confocal microscopy, respectively. (D) Effect of AGO2 inhibitor (BCI-137) on MV release. MVs were collected at days 4 and 7 from the media of heterochronic cultures, which were established in the presence of BCI-137 or vehicle (no inhibitor). The particles were pooled for quantitation by NTA. The values are presented as the mean  $\pm$  SD,  $n = 4$ . (E and F) MVs from 'D' were quantitated for total RNA (E) or small RNA (F). (G) MVs from 'C' were analyzed with miRNA arrays. The results are shown for enrichment of exosomal miRNAs in cultures without inhibitor vs. vehicle in a scatterplot, based on 1.5-fold cutoff. (H) Shown are the output of Ingenuity Pathway Analysis (IPA) using commonly expressed miRNAs with differential expression using 1.5-fold cutoff. The data 'F' and the analyses compared young vs. aged isochronic cultures. (I) Validation of miFinder qPCR array by individual qPCR experiments in array (left panels) and fresh donor samples (right panels). Gating scheme depicts miRNAs that are upregulated in young isochronic and heterochronic vs. aged isochronic cultures. Results are depicted by scatterplot with 1.25-fold and 1.05-fold cutoffs in array and fresh donor samples, respectively. Array and individual qPCR studies were normalized to RNU6, SNORD68 and SNORD95 and presented as fold change, with a value of 1 representing control. Characterizing the young intracellular miRNAs and ascribing a role for miRNAs in the mechanism of restoration (J–P). (J) Small RNA was purified from aged, young and UCB isochronic cultures for whole miRNA sequencing. All miRNAs exhibiting greater than 100 mappable reads were further analyzed. Differential RNA expression is denoted by heatmap, with miRNA exhibiting greater than 1.4-fold difference among aged vs. UCB and young samples. Outer area of the Venn diagrams depicts total number of intracellular miRNAs with greater than 100 mappable reads in age-matched isochronic samples. Overlapping areas represent common miRNA among samples. (K, L) Studies, similar to 'I', compared the miRNAs obtained from sequencing of aged isochronic and heterochronic (young-aged, UCB-aged) samples. (M) MiR showing differential expression in 'J' were compared to miR showing increased or decreased expression in heterochronic (aged-young) vs. aged isochronic cultures in 'K' and 'L'. The results are tabulated to illustrate candidate miRNAs whose expression patterns are coincident with aged cell restoration. (N) Scatterplot depicting linear correlation between exosomal miR-7641-2 expression and total mappable reads,  $n = 10$ . (O) Expression of early exosomal candidate miRNAs from miFinder array studies in sequencing dataset. Results are shown for isochronic and heterochronic cultures as average reads per 10000 total mapped reads. (P) To evaluate whether candidate MV miRNAs can be propagated after aged cell restoration, aged and young cells from 7-day isochronic cultures or aged cells from heterochronic culture were harvested at day 7 and transferred to fresh transwell cultures with naïve aged cells for an additional 7 days. On the 3<sup>rd</sup> (day 10) and 7<sup>th</sup> (day 14) day of the propagation culture, MVs were isolated and probed for candidate miRNA expression by qPCR. Results were normalized to miR-7641-2 expression and presented as fold change, with a value of 1 representing control (gray bars). Results are presented as the mean  $\pm$  SEM,  $n = 3$ , unless otherwise noted. \* $p \leq 0.05$  vs. control. Identification of potential young MV miRNA targets in aged cells (Q–W). (Q) Up- and downregulated intracellular miRNAs comparing aged heterochronic (aged-young) vs. isochronic cultures with a 1.5-fold cutoff, and their (R) predicted activation/inhibition networks after IPA. Up- and downregulated (S) MV miRNAs comparing UCB vs. aged isochronic and (T) intracellular miRNAs comparing aged heterochronic (aged-UCB) vs. isochronic cultures with a 1.5-fold cutoff. (U) Illustration of the top cellular functions (left graph) and canonical pathways (right graph) predicted by (V) these networks are shown. (W) Validation of siRNA knockdown of target candidates in cells from aged donors. Results were normalized to  $\beta$ -Actin expression and presented as fold change, with a value of 1 representing control (scrambled siRNA). Results are presented as the mean  $\pm$  SEM,  $n = 3$ , unless otherwise noted. \* $p \leq 0.05$  vs. control.





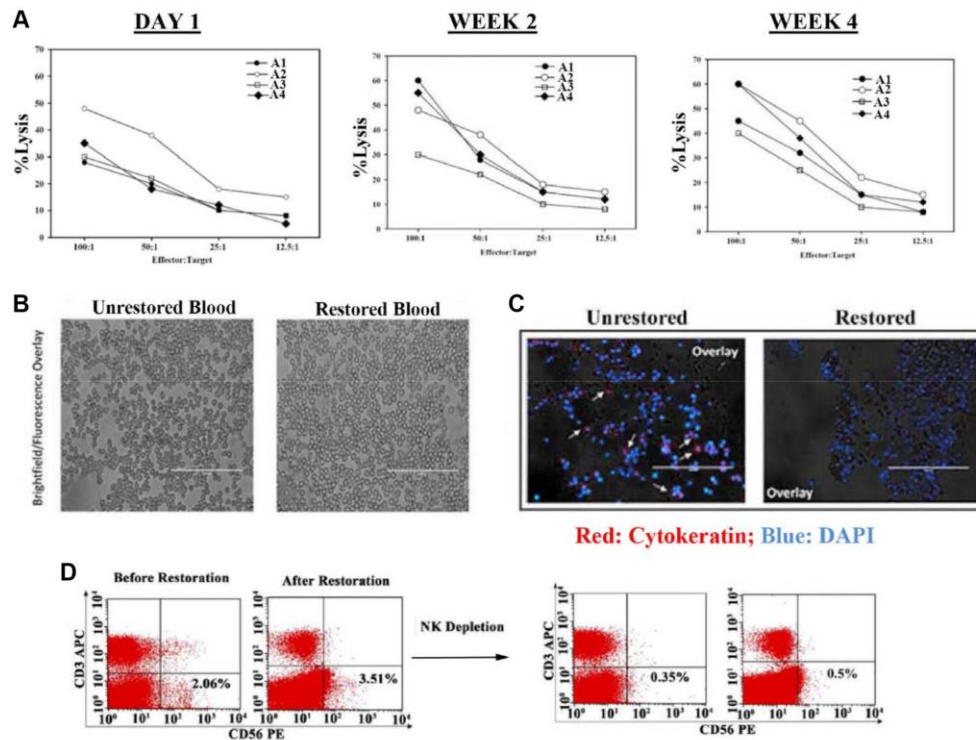

**Supplementary Figure 6.** (A) Timeline natural killer (NK) activity in restored age MPBs. NK activity was performed as described in Materials and Methods at day 1 and, wks 2 and 4 MPBs from heterochronic cultures. The results are shown for four donors, each restored with three different young MPBs. (B) Blood smears for GFP+ cells indicated undetectable GFP positivity in mice at 12 months post-transplant. GFP served as a surrogate of cancer stem cells. (C) Femurs from mice at 12 months after transplantation with restored or unrestored MPBs. The femurs were dissected longitudinally and then washed with PBS. The cells close to the endosteal regions were scraped and placed onto microscope slides, fixed with 1% paraformaldehyde and then labeled with rabbit anti-human pan cytokeratin (1/1000) for human breast cancer cells and secondary labeling with PE-anti-mouse IgG. DAPI labeling for nuclear labeling of all cells. The slides were immediately imaged with the Evos fl2 auto imager. Representative images show the overlays of the labeled and bright field images at 100x magnification. (D) Representative results for CD56+ cells in restored and unrestored MPBs, with or without NK cell depletion.
